# Supplementary material for: Paenibacillus strains with nitrogen fixation and multiple beneficial properties for promoting plant growth
Source: PeerJ. 2019 Sep 23;7:e7445. doi: 10.7717/peerj.7445 (PMC6761918; doi:10.7717/peerj.7445)
Supplement: Supplemental Information 1 [file peerj-07-7445-s001.xlsx]

## Sheet: Antimicrobial activity 
Isolates	Rhizoctonia cerealis			Fusarium graminearum			Gibberella zeae			Fusarium solani			Colletotrichum gossypii			Alternaria longipes
	Inhibition zone diameters(mm)	Average	Stdev	Inhibition zone diameters(mm)	Average	Stdev	Inhibition zone diameters(mm)	Average	Stdev	Inhibition zone diameters(mm)	Average	Stdev	Inhibition zone diameters(mm)	Average	Stdev	Inhibition zone diameters(mm)	Average	Stdev
BJ-2	24	24.5333	0.503322	25	26.6	1.44222	32.4	25.1333	6.31295	-	-	-	20.2	24.6667	3.97157	26.2	20.1333	5.36781
	24.6			27.8			22			-			26			16
	25			27			21			-			27.8			18.2
SZ-1a	24.2	23.3333	1.02632	24.2	27.4	2.8	32.2	25.2667	6.03435	-	-	-	19.6	20.0667	0.503322	30.2	22.0667	7.04367
	22.2			28.6			22.4			-			20			18
	23.6			29.4			21.2			-			20.6			18
SZ-1b	24.2	26.6667	2.13854	26.2	27.9333	1.61658	24.2	23.3333	0.90185	-	-	-	24.2	23.4	1.0583	26.2	25.4	1.21655
	27.8			28.2			22.4			-			22.2			24
	28			29.4			23.4			-			23.8			26
BJ-4	23	24.4	1.4	26	26.2	0.2	27.8	24.8667	2.61024	-	-	-	18.2	19.2667	1.00664	29.2	28.4667	0.64291
	25.8			26.2			22.8			-			20.2			28.2
	24.4			26.4			24			-			19.4			28
BJ-5	-	-	-	26.8	25.4	3.89358	17.8	15.9333	1.72434	-	-	-	15.8	18.6	3.01993	18.2	18.8	1.03923
	-			28.4			14.4			-			18.2			20
	-			21			15.6			-			21.8			18.2
SZ-8	24.2	22.1333	2.00333	29	28.6	0.34641	34.4	26.9333	6.54319	-	-	-	24.8	24.2667	0.503322	29.8	23.9333	5.17816
	20.2			28.4			22.2			-			23.8			22
	22			28.4			24.2			-			24.2			20
BJ-7	24.2	24.4667	0.46188	29.6	27.3333	2.53246	29.4	27.0667	2.08167	-	-	-	29.6	25.9333	3.80701	27.8	22.8	4.38634
	25			27.8			25.4			-			26.2			19.6
	24.2			24.6			26.4			-			22			21
SZ-10	22	23.5333	1.41892	30.2	30	0.34641	34.4	28.2667	5.37153	-	-	-	23.6	25.2	2.27156	28	20.1333	6.99809
	23.8			29.6			26			-			24.2			17.8
	24.8			30.2			24.4			-			27.8			14.6
SZ-11	23	24.2667	1.13725	25.6	21	4.08412	29	24.4	3.98497	-	-	-	20.2	22.8	2.25389	25.8	21.2667	4.05134
	24.6			17.8			22			-			24.2			20
	25.2			19.6			22.2			-			24			18
SZ-13a	30.2	26.5333	3.25167	24	25.6667	1.94251	35.4	28.5333	6.01443	-	-	-	24	24.3333	0.57735	28	25.2	2.43311
	25.4			25.2			26			-			24			24
	24			27.8			24.2			-			25			23.6
SZ-13b	28.2	25.6	2.27156	19.6	24.2	4.01497	32.2	25.8	5.76888	10.8	10.5333	0.46188	36.2	28.0667	7.04651	29.8	24.6667	4.44672
	24			26			21			10			24.2			22
	24.6			27			24.2			10.8			23.8			22.2
SZ-15	30	26.2667	3.23934	22.4	25.2	2.55343	30.4	27.8667	2.2301	-	-	-	27.8	26.2667	2.00333	28.6	22.8667	4.96521
	24.6			27.4			27			-			24			20
	24.2			25.8			26.2			-			27			20
SZ-16	22.6	23.4	0.72111	22	26.5333	4.05134	30.2	26	3.63868	-	-	-	24.4	24.8667	2.92803	27.8	24.8667	2.90057
	24			29.8			24			-			22.2			24.8
	23.6			27.8			23.8			-			28			22
BJ-6	21.4	20.3333	1.84752	20	18.6667	2.48462	-	-	-	6.8	6.13333	0.61101	16.2	19.4	4.2332	-	-	-
	21.4			15.8			-			6			17.8			-
	18.2			20.2			-			5.6			24.2			-
AH-1	29.8	26.6	2.94618	25.8	27.3333	1.33167	31.8	29.2667	2.96873	-	-	-	27.8	24.9333	2.64071	28	22.4667	4.79305
	24			28			30			-			24.4			19.8
	26			28.2			26			-			22.6			19.6
SZ-14	24.2	23.6	0.87178	25.8	27.2667	2.20303	32.2	27.3333	4.35584	-	-	-	27.6	26	1.7088	27.4	21.8	4.95177
	22.6			29.8			26			-			24.2			20
	24			26.2			23.8			-			26.2			18
YN-3	23.8	22.7333	0.92376	22	24.8	3.14325	34	31	2.64575	-	-	-	24.2	22.8	1.21655	25.8	23.9333	1.90088
	22.2			24.2			29			-			22.2			24
	22.2			28.2			30			-			22			22
AH-3	-	-	-	-	-	-	-	-	-	-	-	-	-	-	-	-	-	-
	-			-			-			-			-			-
	-			-			-			-			-			-
AH-4	14	11.4	2.25389	-	-	-	-	-	-	-	-	-	-	-	-	-	-	-
	10			-			-			-			-			-
	10.2			-			-			-			-			-
YB-3	19.8	20.8667	1.10151	27.8	30.2667	2.19393	28	26.1333	1.8037	-	-	-	21.6	23.2	1.38564	26	25.1333	1.02632
	22			32			24.4			-			24			25.4
	20.8			31			26			-			24			24
WF-6	20.2	22.3333	1.94251	16.2	19.4667	3.03535	30.2	26.7333	3.16439	-	-	-	26.2	25.6	2.94618	25.8	21.8667	3.72201
	24			20			24			-			22.4			18.4
	22.8			22.2			26			-			28.2			21.4
JS-4	22.8	25.2	2.08806	24.6	28	3.61663	35.8	30.6667	4.44672	-	-	-	30	34	6.9282	24.2	25.4667	1.10151
	26.2			27.6			28			-			30			26.2
	26.6			31.8			28.2			-			42			26
HN-1	-	-	-	-	-	-	-	-	-	-	-	-	-	-	-	-	-	-
	-			-			-			-			-			-
	-			-			-			-			-			-
CD-4a	-	-	-	-	-	-	-	-	-	-	-	-	-	-	-	-	-	-
	-			-			-			-			-			-
	-			-			-			-			-			-
CD-4b	-	-	-	-	-	-	-	-	-	-	-	-	-	-	-	-	-	-
	-			-			-			-			-			-
	-			-			-			-			-			-
