# Supplementary material for: Paenibacillus strains with nitrogen fixation and multiple beneficial properties for promoting plant growth
Source: PeerJ. 2019 Sep 23;7:e7445. doi: 10.7717/peerj.7445 (PMC6761918; doi:10.7717/peerj.7445)
Supplement: Supplemental Information 2 [file peerj-07-7445-s002.xlsx]

## Sheet: Standard curve
Concentrations of IAA (mg/mL)	OD530nm
0	0
10	0.23
20	0.458
30	0.656
40	0.821
50	0.958

## Sheet: IAA production
Isolates	OD530nm	IAA production (mg/mL)	Average	Stdev
BJ-2	0.134	4.99482	5.09845	0.137086
	0.139	5.25389
	0.135	5.04663
SZ-1a	0.152	5.92746	6.22107	0.285366
	0.163	6.49741
	0.158	6.23834
SZ-1b	0.161	6.39378	6.41105	0.0791464
	0.163	6.49741
	0.16	6.34197
BJ-4	0.138	5.20207	5.61658	0.358974
	0.15	5.82383
	0.15	5.82383
BJ-5	0.168	6.75648	6.63558	0.209402
	0.168	6.75648
	0.161	6.39378
SZ-8	0.09	2.71503	2.90501	0.374828
	0.089	2.66321
	0.102	3.33679
BJ-7	0.089	2.66321	3.31952	0.570733
	0.107	3.59585
	0.109	3.69948
SZ-10	0.076	1.98964	2.12781	0.285366
	0.085	2.45596
	0.075	1.93782
SZ-11	0.077	2.04145	1.95509	0.0791464
	0.075	1.93782
	0.074	1.88601
SZ-13a	0.118	4.1658	3.92401	0.333114
	0.116	4.06218
	0.106	3.54404
SZ-13b	0.111	3.80311	2.95682	0.786359
	0.092	2.81865
	0.081	2.2487
SZ-15	0.106	3.54404	3.44041	0.274171
	0.108	3.64767
	0.098	3.12953
SZ-16	0.063	1.31606	1.78238	0.411257
	0.075	1.93782
	0.078	2.09326
BJ-6	0.122	4.37306	5.1848	0.714826
	0.143	5.46114
	0.148	5.72021
AH-1	0.04	0.124352	0.867012	0.647841
	0.06	1.16062
	0.063	1.31606
SZ-14	0.073	1.8342	2.64594	0.714826
	0.094	2.92228
	0.099	3.18135
YN-3	0.129	4.73575	4.61485	0.107858
	0.126	4.58031
	0.125	4.5285
AH-3	0.079	2.14508	2.23143	0.149573
	0.084	2.40415
	0.079	2.14508
AH-4	0.089	2.66321	2.71503	0.391183
	0.098	3.12953
	0.083	2.35233
YB-3	0.161	6.39378	6.4456	0.0897436
	0.161	6.39378
	0.164	6.54922
WF-6	0.178	7.27461	7.18826	0.196163
	0.179	7.32642
	0.172	6.96373
JS-4	0.112	3.85492	4.09672	0.209402
	0.119	4.21762
	0.119	4.21762
HN-1	0.079	2.14508	1.95509	0.166557
	0.074	1.88601
	0.073	1.8342
CD-4a	-	-	-	-
	-	-	-	-
	-	-	-	-
CD-4b	-	-	-	-
	-	-	-	-
	-	-	-	-
