# Supplementary material for: Paenibacillus strains with nitrogen fixation and multiple beneficial properties for promoting plant growth
Source: PeerJ. 2019 Sep 23;7:e7445. doi: 10.7717/peerj.7445 (PMC6761918; doi:10.7717/peerj.7445)
Supplement: Supplemental Information 3 [file peerj-07-7445-s003.xlsx]

## Sheet: Nitrogenase activity
Isolates	Nitrogenase activities	Average	Stdev
BJ-2	1040.53	1085.61	75.6432
	1043.36
	1172.94
SZ-1a	114.66	118.65	3.97015
	122.6
	118.69
SZ-1b	13605.1	11868.6	1740.55
	10124
	11876.8
BJ-4	1779.45	1296.94	439.169
	920.56
	1190.82
BJ-5	509.86	468.627	42.1959
	470.49
	425.53
SZ-8	1124.08	1131.54	15.9198
	1149.82
	1120.72
BJ-7	294.98	314.603	19.1768
	333.3
	315.53
SZ-10	379.55	371.277	7.66739
	369.87
	364.41
SZ-11	775.98	857.467	114.888
	988.87
	807.55
SZ-13a	9740.93	9731.36	259.712
	9986.16
	9467
SZ-13b	3029.29	3131.89	100.613
	3136
	3230.39
SZ-15	1352.83	1316.19	36.64
	1279.55
	1316.2
SZ-16	318.03	444.727	119.109
	554.42
	461.73
BJ-6	143.03	176.7	29.4342
	197.55
	189.52
AH-1	109.44	192.427	73.0852
	220.64
	247.2
SZ-14	323.45	331.953	22.7309
	314.7
	357.71
YN-3	3246.7	3201.92	104.963
	3277.06
	3081.99
AH-3	73.85	57.23	14.4376
	47.79
	50.05
AH-4	7605.72	6514.37	997.125
	5650.93
	6286.46
YB-3	779.89	733.917	49.2855
	681.88
	739.98
WF-6	1741.14	2081.3	340.661
	2422.46
	2080.29
JS-4	7096.61	6843.56	365.687
	6424.29
	7009.79
HN-1	4502.52	4476.8	306.64
	4158.11
	4769.77
CD-4a	286.54	272.667	14.238
	258.09
	273.37
CD-4b	4801.15	5174.69	478.7
	5714.31
	5008.6
